# Supplementary material for: Drosophila aPKC is required for mitotic spindle orientation during symmetric division of epithelial cells
Source: Oxford University Press journal article supplement (doi:10.1242/dev.071027), 2012-01-06
Supplement: dev071027figs3.pdf [file dev071027figs3.pdf]

A

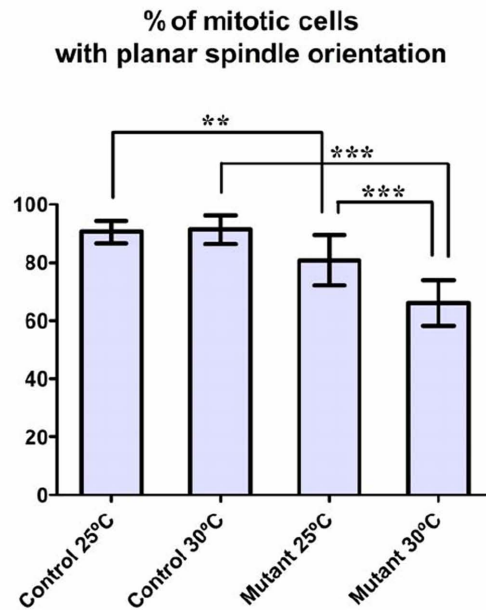

B

| % of mitotic divisions with planar spindle orientation                                   |                                                 |             |     |              |                |    |           |     |
|------------------------------------------------------------------------------------------|-------------------------------------------------|-------------|-----|--------------|----------------|----|-----------|-----|
| Genotypes compared                                                                       | Mean ± SD (%)                                   |             | ≠   | P value (t-) | n (wing discs) |    | n (cells) |     |
|                                                                                          | apkc <sup>ts</sup> /+(25°C) vs Df(2R)l4/+(25°C) | 91.9 ± 2.03 |     |              | 89.4 ± 4.75    | NO | P=0.281   | 5   |
| apkc <sup>ts</sup> /+(30°C) vs Df(2R)l4/+(30°C)                                          | 90.0 ± 5.21                                     | 92.4 ± 4.70 | NO  | P=0.398      | 6              | 7  | 181       | 282 |
| apkc <sup>ts</sup> /Df(2R)l4 (25°C) vs apkc <sup>ts</sup> /apkc <sup>k06403</sup> (25°C) | 79.7 ± 11.3                                     | 82.3 ± 3.11 | NO  | P=0.603      | 8              | 6  | 217       | 193 |
| apkc <sup>ts</sup> /Df(2R)l4 (30°C) vs apkc <sup>ts</sup> /apkc <sup>k06403</sup> (30°C) | 65.4 ± 5.69                                     | 67.1 ± 10.2 | NO  | P=0.659      | 10             | 8  | 243       | 213 |
| Control 25°C <sup>1</sup> vs Control 30°C <sup>2</sup>                                   | 90.5 ± 3.8                                      | 91.3 ± 4.8  | NO  | p=0.682      | 11             | 13 | 376       | 489 |
| Control 25°C <sup>1</sup> vs Mutant 25°C <sup>3</sup>                                    | 90.5 ± 3.8                                      | 80.8 ± 8.6  | YES | P=0.002      | 11             | 14 | 376       | 410 |
| Control 25°C <sup>1</sup> vs Mutant 30°C <sup>4</sup>                                    | 90.5 ± 3.8                                      | 66.1 ± 7.8  | YES | P=0.0001     | 11             | 18 | 376       | 456 |
| Control 30°C <sup>2</sup> vs Mutant 25°C <sup>3</sup>                                    | 91.3 ± 4.8                                      | 80.8 ± 8.6  | YES | P=0.0007     | 13             | 14 | 489       | 410 |
| Control 30°C <sup>2</sup> vs Mutant 30°C <sup>4</sup>                                    | 91.3 ± 4.8                                      | 66.1 ± 7.8  | YES | P=0.0001     | 13             | 18 | 489       | 456 |
| Mutant 25°C <sup>3</sup> vs Mutant 30°C <sup>4</sup>                                     | 80.8 ± 8.6                                      | 66.1 ± 7.8  | YES | P=0.0001     | 14             | 18 | 410       | 456 |

<sup>1</sup>The genotypes apkc<sup>ts</sup>/+ and Df(2R)l4/+ at 25°C were pooled.

<sup>2</sup>The genotypes apkc<sup>ts</sup>/+ and Df(2R)l4/+ at 30°C were pooled.

<sup>3</sup>The genotypes apkc<sup>ts</sup>/Df(2R)l4 and apkc<sup>ts</sup>/apkc<sup>k06403</sup> at 25°C were pooled.

<sup>4</sup>The genotypes apkc<sup>ts</sup>/Df(2R)l4 and apkc<sup>ts</sup>/apkc<sup>k06403</sup> at 30°C were pooled.
