# Supplementary figures and images for: Drosophila aPKC is required for mitotic spindle orientation during symmetric division of epithelial cells
Source: Oxford University Press journal article supplement (doi:10.1242/dev.071027), 2012-01-06

# *apkc<sup>ts</sup>* Zygotic Viability

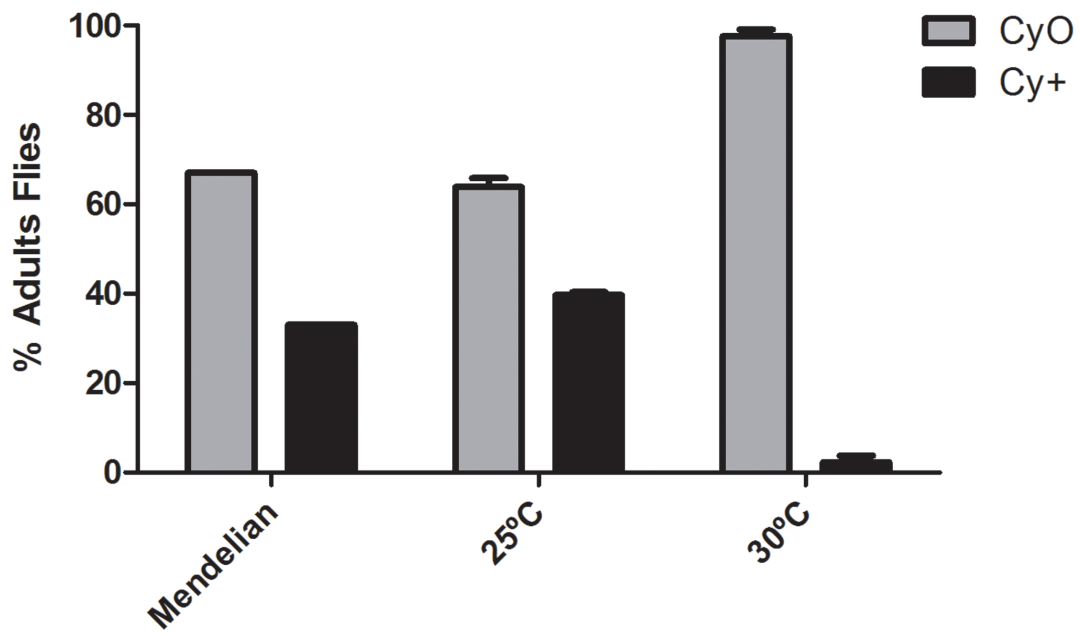

Supplement: dev071027figs1.pdf [file dev071027figs1.pdf]

**A**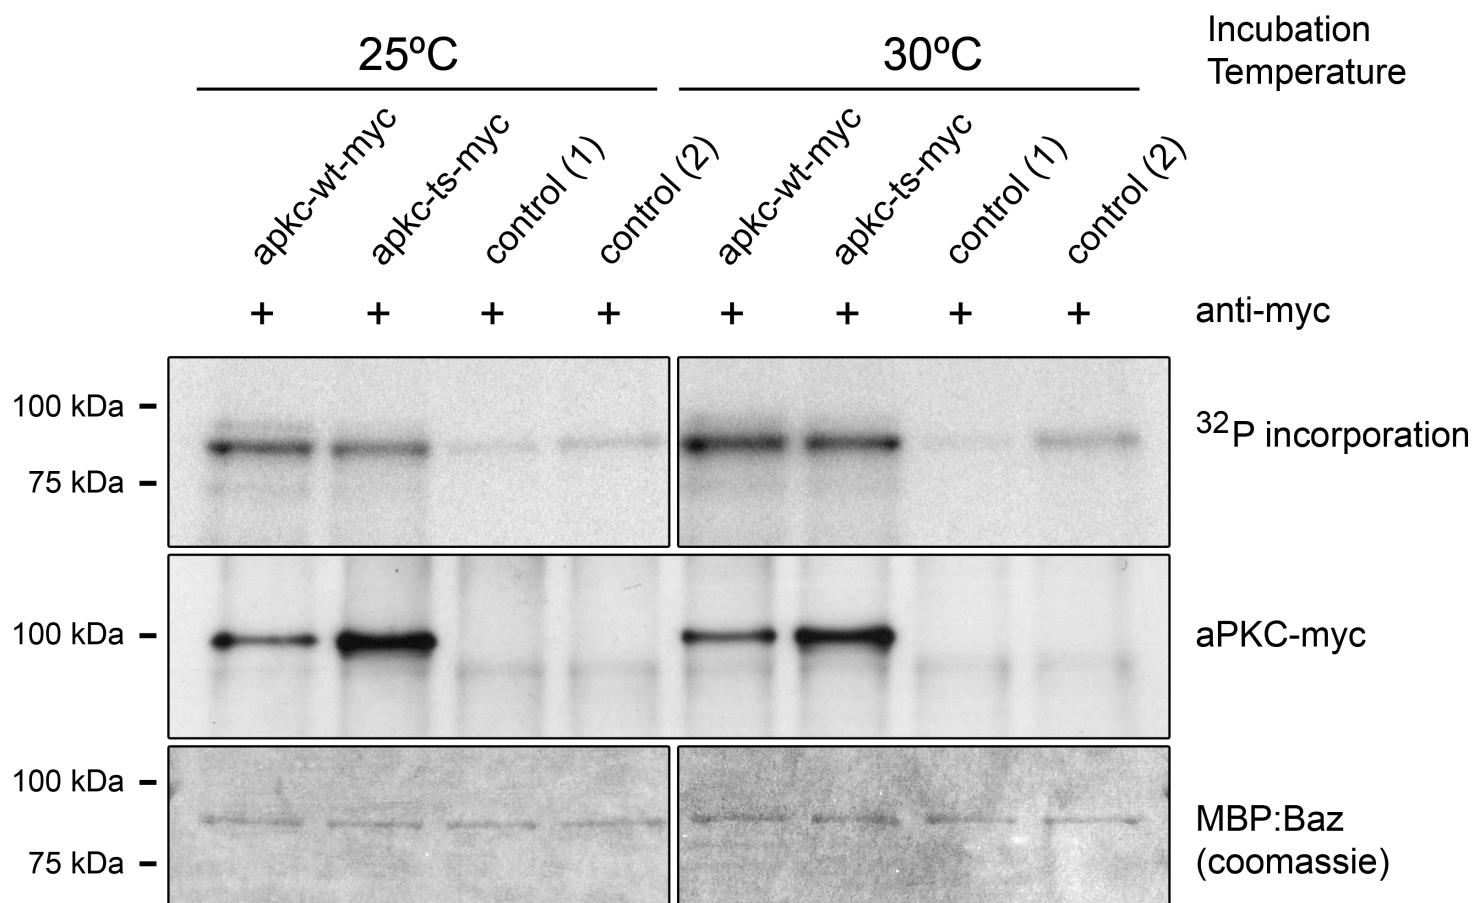**B**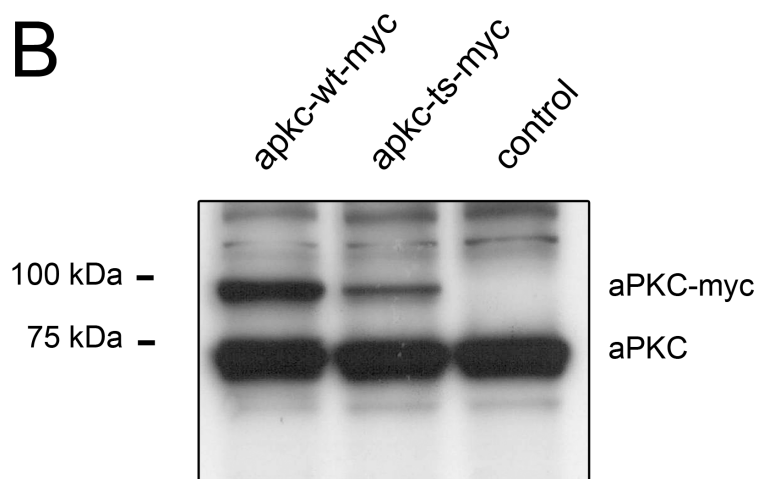

Supplement: dev071027figs2.pdf [file dev071027figs2.pdf]

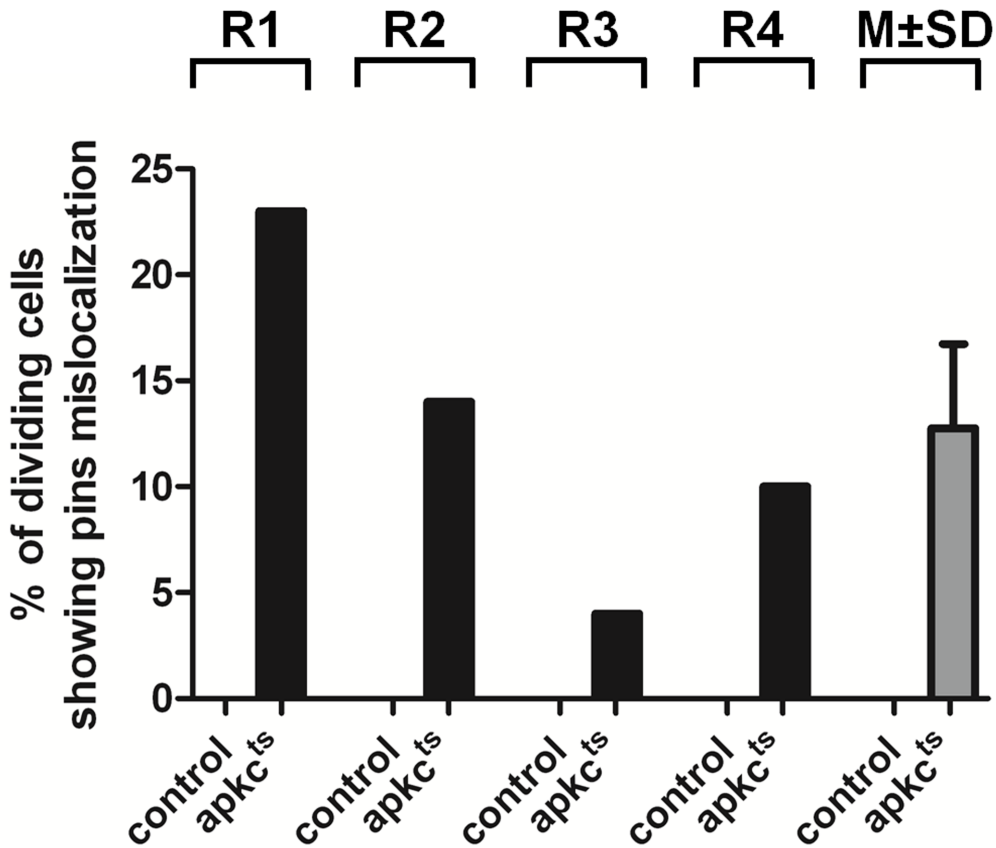

Supplement: dev071027figs4.pdf [file dev071027figs4.pdf]

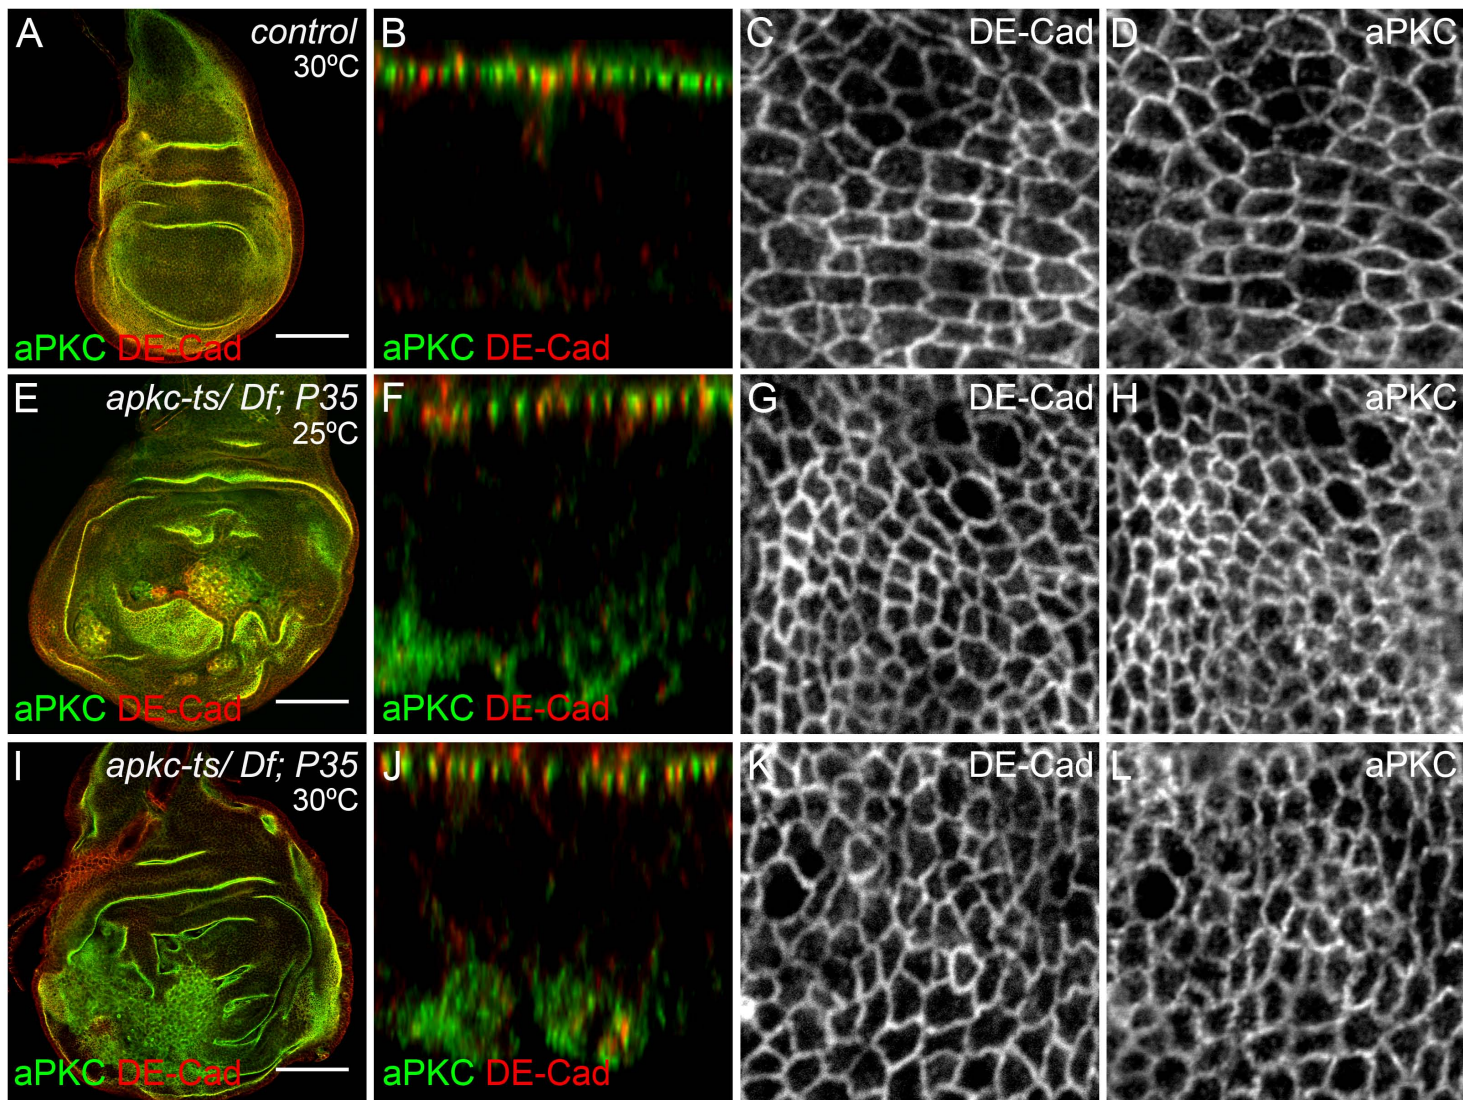

Supplement: dev071027figs5.pdf [file dev071027figs5.pdf]

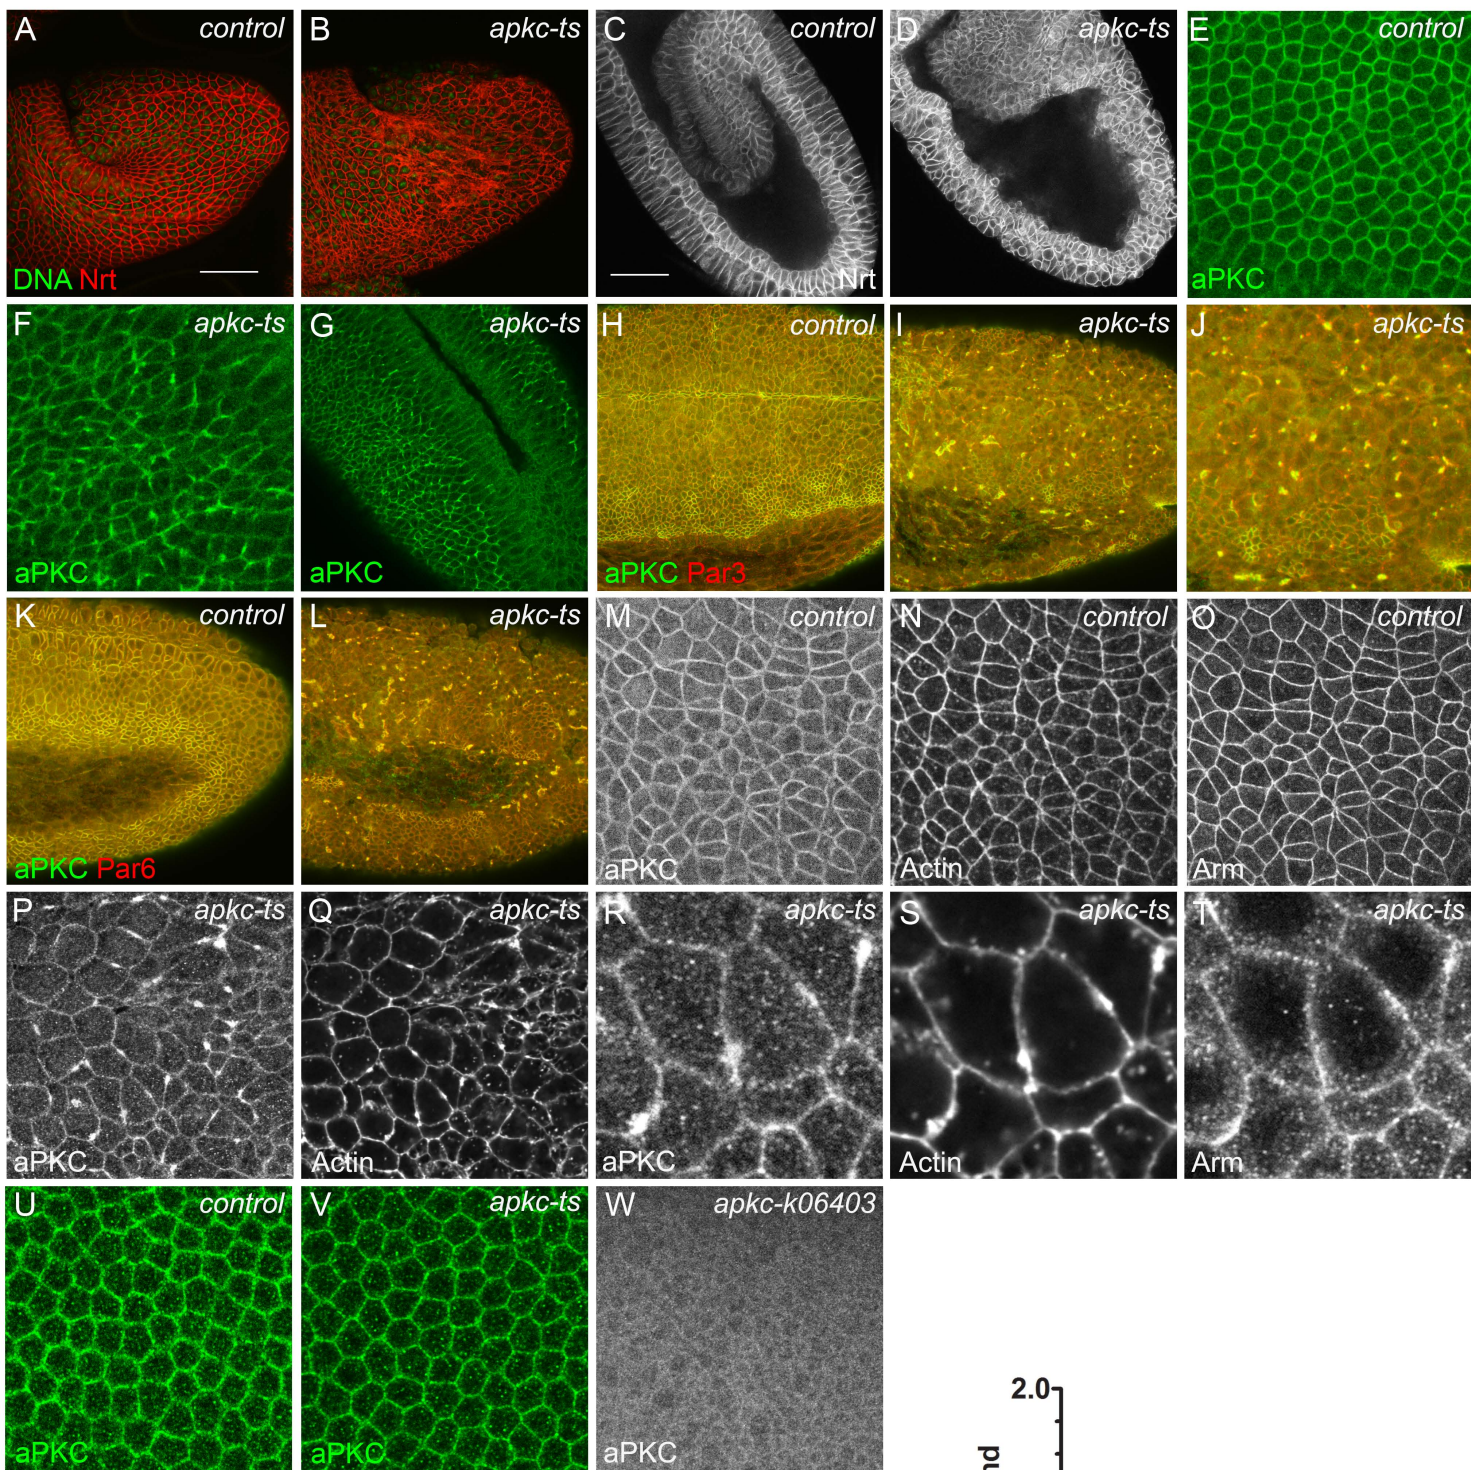

X

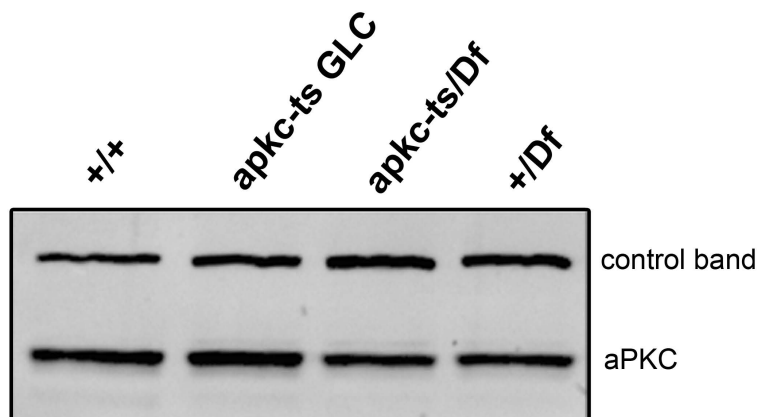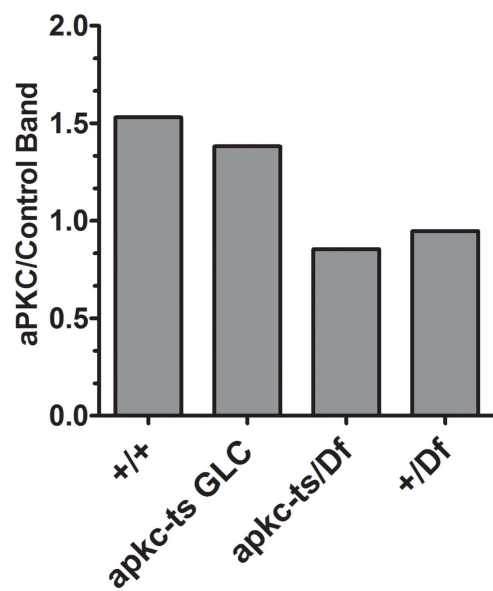

Supplement: dev071027figs6.pdf [file dev071027figs6.pdf]

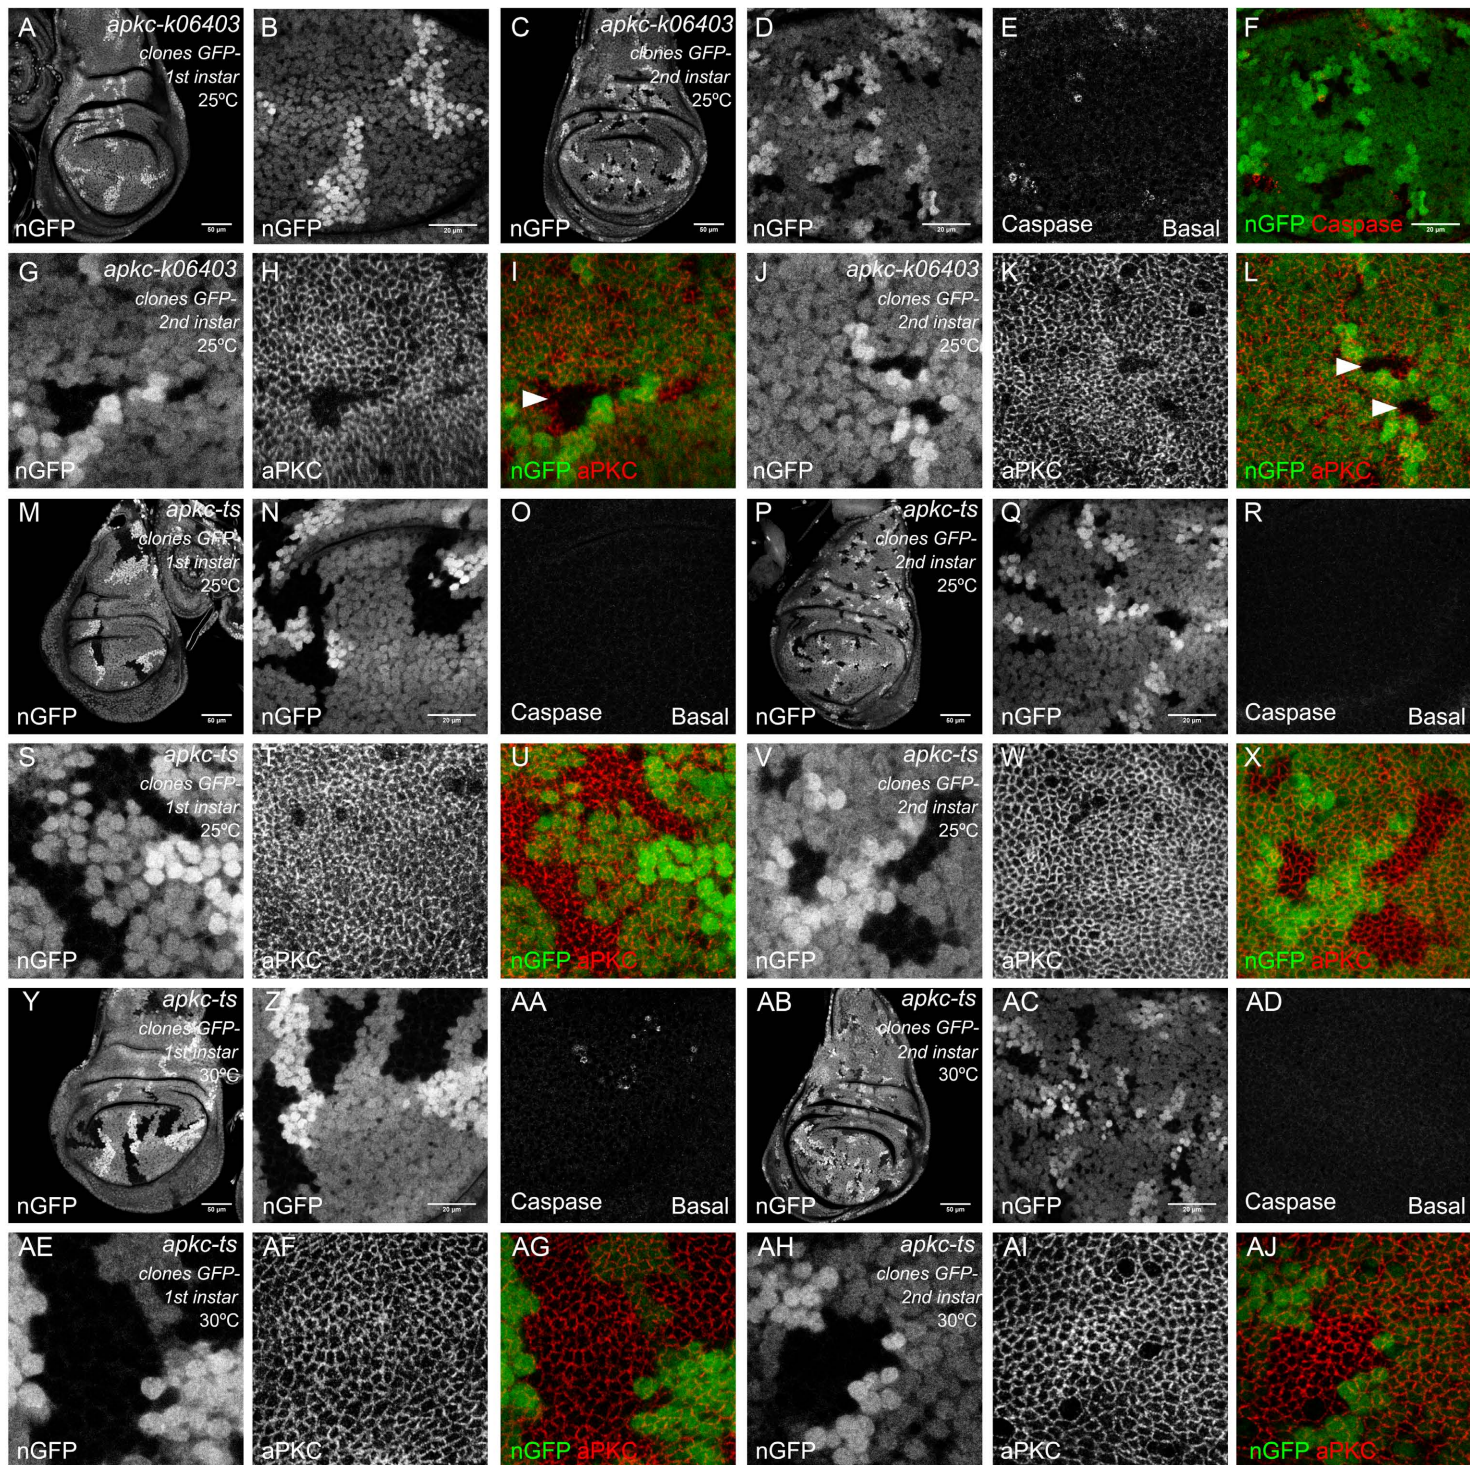

Supplement: dev071027figs7.pdf [file dev071027figs7.pdf]

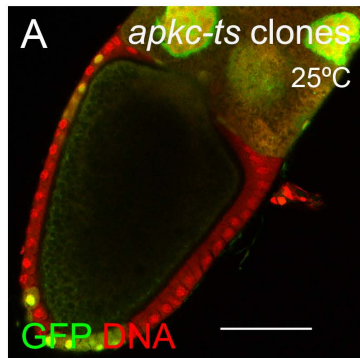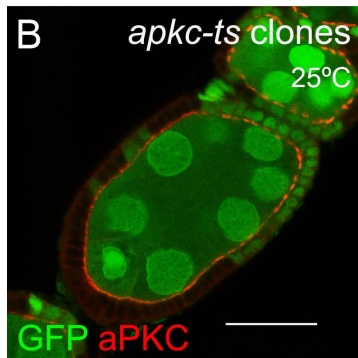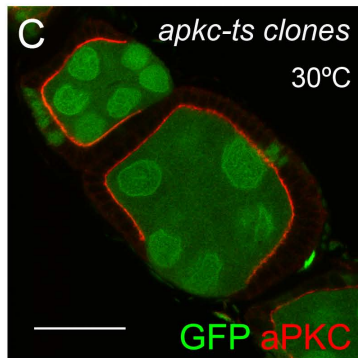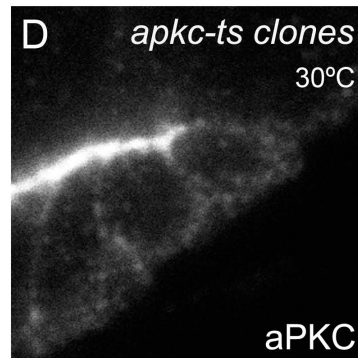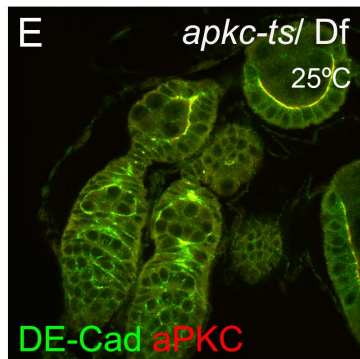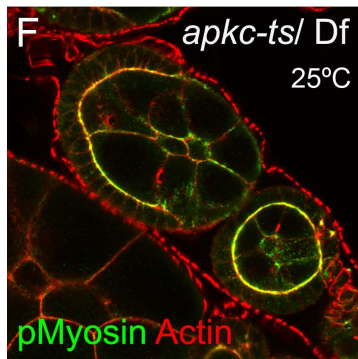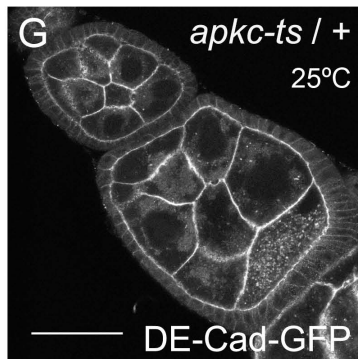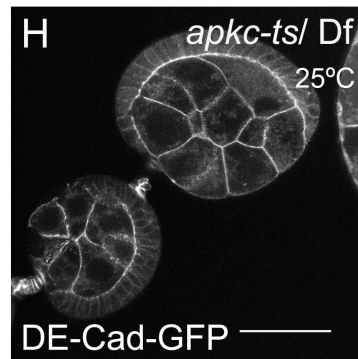

Supplement: dev071027figs8.pdf [file dev071027figs8.pdf]
